# Supplementary material for: Comparative genome analysis of 24 bovine-associated Staphylococcus isolates with special focus on the putative virulence genes
Source: PeerJ. 2018 Mar 30;6:e4560. doi: 10.7717/peerj.4560 (PMC5880176; doi:10.7717/peerj.4560)
Supplement: Table S3 — For each isolate and each gene encoding specific virulence factor, the number of gene copies found by annotation is given first, and after slash, the number of copies encoding putative secreted virulence proteins, predicted by SignalP program, is given. For virulence factors found by blast analysis on whole genomes, identity (ID) and query cover (QC) percents together with corresponding E-value of the best hit are given. [file peerj-06-4560-s003.xlsx]

## Sheet: VFs_comparison
Supplemental table 3. Virulence factors identified in each Staphylococcus isolate.
For each isolate and each gene encoding specific virulence factor, the number of gene copies found by annotation is given first, and after slash, the number of copies encoding putative secreted virulence proteins, predicted by SignalP program, is given. For virulence factors found by blast analysis on whole genomes, identity (ID) and query cover (QC) percents together with corresponding E-value o…
Virulence factors1	Related genes	Extracellular/ cell wall location of relevant reference virulence factors4	Staphylococcus agnetis				Staphylococcus aureus				Staphylococcus chromogenes								Staphylococcus simulans
			6-4Tc	33c	43s	59s	9c	75c	110s	112s	22c	38c	72c	117c	46s	92s	101s	121s	15c	19c	52c	116c	78s	97s	102s	113s
Toxins
Hemolysins
Alpha hemolysin Q2G1X0	hly/hla	Y	ND	ND	ND	ND	1/1	1/1	1/1	1/1	ND	ND	ND	ND	ND	ND	ND	ND	ND	ND	ND	ND	ND	ND	ND	ND
Phospholipase C (Beta-hemolysin, beta-toxin, sphingomyelinase) P09978	hlb	Y	1/1	1/1	1/1	1/1	1/0	1/1	1/1	1/1	1/0	1/0	1/0	1/0	1/0	1/0	1/0	1/0	ND	ND	ND	1/1	ND	ND	ND	ND
Delta-hemolysin (Delta-lysin, delta-toxin) P0C1V1	hld	Y	ND	ND	ND	ND	1/0	ID99%, QC100% E: 2e-65	ID99%, QC100% E: 2e-65	ID99%, QC100% E: 2e-65	ND	ND	ND	ND	ND	ND	ND	ND	ND	ND	ND	ND	ND	ND	ND	ND
Hemolysin III	N/A	~	1/0	1/0	1/0	1/0	1/0	1/0	1/0	1/0	1/0	1/0	1/0	1/0	1/0	1/0	1/0	1/0	1/0	1/0	1/0	1/0	1/0	1/0	1/0	1/0
Bicomponent leukotoxins
Gamma-hemolysin components A, B, and C P0A074	hlgA	Y	ND	ND	ND	ND	1/1	2/2	2/2	2/2	ND	ND	ND	ND	ND	ND	ND	ND	ND	ND	ND	ND	ND	ND	ND	ND
	hlgC	Y	ND	ND	ND	ND	1/1	1/1	1/1	1/1	ND	ND	ND	ND	ND	ND	ND	ND	ND	ND	ND	ND	ND	ND	ND	ND
	hlgB	Y	ND	ND	ND	ND	1/1	2/1	2/1	1/1	ND	ND	ND	ND	ND	ND	ND	ND	ND	ND	ND	ND	ND	ND	ND	ND
Panton-Valentine leukocidin (PVL) P31716, P31715	lukS-PV	Y	ND	ND	ND	ND	1/1	1/1	1/1	1/1	ND	ND	ND	ND	ND	ND	ND	ND	ND	ND	ND	ND	ND	ND	ND	ND
	lukF-PV	Y	ND	ND	ND	ND	1/1	1/1	1/1	1/1	ND	ND	ND	ND	ND	ND	ND	ND	ND	ND	ND	ND	ND	ND	ND	ND
Leukocidin LukM/F'	lukM	~	ND	ND	ND	ND	ND	ND	ND	ND	ND	ND	ND	ND	ND	ND	ND	ND	ND	ND	ND	ND	ND	ND	ND	ND
	lukF'-PV	~	ND	ND	ND	ND	ND	ND	ND	ND	ND	ND	ND	ND	ND	ND	ND	ND	ND	ND	ND	ND	ND	ND	ND	ND
Leukocidin LukED2 O54082	lukD2	Y	ND	ND	ND	ND	1/1	2/2	2/2	2/2	ND	ND	ND	ND	ND	ND	ND	ND	ND	ND	ND	1/1	ND	ND	ND	ND
	lukE	Y	ND	ND	ND	ND	1/1	1/1	1/1	1/1	ND	ND	ND	ND	ND	ND	ND	ND	ND	ND	ND	ND	ND	ND	ND	ND
Exfoliative toxins
Exfoliative toxin A2 P09331	eta	~	1/1	ND	1/1	1/1	ND	ND	ND	ND	ND	ND	ND	ND	ND	ND	ND	ND	ND	ND	ND	ND	ND	ND	ND	ND
Exfoliative toxin B P09332	etb	~	ND	ND	ND	ND	ND	ND	ND	ND	ND	ND	ND	ND	ND	ND	ND	ND	ND	ND	ND	ND	ND	ND	ND	ND
Exfoliative toxin types C-D	etc-etd	~	ND	ND	ND	ND	ND	ND	ND	ND	ND	ND	ND	ND	ND	ND	ND	ND	ND	ND	ND	ND	ND	ND	ND	ND
Staphylococcal superantigens (Sags)
Toxic shock syndrome toxin-1 P06886	tst1	Y	ND	ND	ND	ND	ND	ND	1/1	ND	ND	ND	ND	ND	ND	ND	ND	ND	ND	ND	ND	ND	ND	ND	ND	ND
Enterotoxins and enterotoxin-like toxins
Enterotoxin type A P0A0L2	entA (sea)	Y	ND	ND	ND	ND	ND	ND	ND	ND	ND	ND	ND	ND	ND	ND	ND	ND	ND	ND	ND	ND	ND	ND	ND	ND
Enterotoxin type B P01552	entB (seb)	Y	ND	ND	ND	ND	ND	ND	1/1	ND	ND	ND	ND	ND	ND	ND	ND	ND	ND	ND	ND	ND	ND	ND	ND	ND
Enterotoxin type C P01553	entC (sec)	Y	ND	ND	ND	ND	ND	ND	ID99%, QC99% E: 0.0	ND	ND	ND	ND	ND	ND	ND	ND	ND	ND	ND	ND	ND	ND	ND	ND	ND
Enterotoxin type D P20723	entD (sed)	Y	ND	ND	ND	ND	ND	ND	ND	ND	ND	ND	ND	ND	ND	ND	ND	ND	ND	ND	ND	ND	ND	ND	ND	ND
Enterotoxin type E P12993	entE (see)	Y	ND	ND	ND	ND	ND	ND	ND	ND	ND	ND	ND	ND	ND	ND	ND	ND	ND	ND	ND	ND	ND	ND	ND	ND
Enterotoxin type proteins F-I	sef-sei	~	ND	ND	ND	ND	ND	ND	ND	ND	ND	ND	ND	ND	ND	ND	ND	ND	ND	ND	ND	ND	ND	ND	ND	ND
Enterotoxin J	sej	~	ND	ND	ND	ND	ND	ND	ND	ND	ND	ND	ND	ND	ND	ND	ND	ND	ND	ND	ND	ND	ND	ND	ND	ND
Enterotoxin K	entK (sek)	~	ND	ND	ND	ND	2/1	3/0	3/0	2/1	ND	ND	ND	ND	ND	ND	ND	ND	ND	ND	ND	ND	ND	ND	ND	ND
Extracellular enterotoxin L	sel	~	ND	ND	ND	ND	ND	ND	1/1	ND	ND	ND	ND	ND	ND	ND	ND	ND	ND	ND	ND	ND	ND	ND	ND	ND
Enterotoxin M	N/A	~	ND	ND	ND	ND	ND	ND	ND	ND	ND	ND	ND	ND	ND	ND	ND	ND	ND	ND	ND	ND	ND	ND	ND	ND
Enterotoxin N	entN	~	ND	ND	ND	ND	ND	ND	ND	ND	ND	ND	ND	ND	ND	ND	ND	ND	ND	ND	ND	ND	ND	ND	ND	ND
Enterotoxins O-T	seo-set	~	ND	ND	ND	ND	ND	ND	ND	ND	ND	ND	ND	ND	ND	ND	ND	ND	ND	ND	ND	ND	ND	ND	ND	ND
Enterotoxin-like U, U variant	N/A	~	ND	ND	ND	ND	ND	ND	ND	ND	ND	ND	ND	ND	ND	ND	ND	ND	ND	ND	ND	ND	ND	ND	ND	ND
Enterotoxin-like V	N/A	~	ND	ND	ND	ND	ND	ND	ND	ND	ND	ND	ND	ND	ND	ND	ND	ND	ND	ND	ND	ND	ND	ND	ND	ND
Enterotoxin-like toxin X	selx	~	ND	ND	ND	ND	ND	ND	ND	ND	ND	ND	ND	ND	ND	ND	ND	ND	ND	ND	ND	ND	ND	ND	ND	ND
Enterotoxin family protein	N/A	~	ND	ND	ND	ND	1/0	1/0	2/0	1/0	ND	ND	ND	ND	ND	ND	ND	ND	ND	ND	ND	ND	ND	ND	ND	ND
Enterotoxin, phage associated	N/A	~	ND	ND	ND	ND	4/3	5/3	5/3	5/3	ND	ND	ND	ND	ND	ND	ND	ND	ND	ND	ND	ND	ND	ND	ND	ND
Staphylococcal superantigen-like (SSL) proteins
Exotoxin3	Un-numbered3	~	4/4	1/1	4/4	4/4	1/1	ND	ND	ND	ND	2/2	ND	ND	ND	ND	ND	ND	ND	ND	ND	ND	ND	ND	ND	ND
	set1	~	ND	ND	ND	ND	1/1	1/1	1/1	1/1	ND	ND	ND	ND	ND	ND	ND	ND	ND	ND	ND	ND	ND	ND	ND	ND
	set2, set3	~	ND	ND	ND	ND	ND	ND	ND	ND	ND	ND	ND	ND	ND	ND	ND	ND	ND	ND	ND	ND	ND	ND	ND	ND
	set4	~	ND	ND	ND	ND	1/1	1/1	1/1	1/1	ND	ND	ND	ND	ND	ND	ND	ND	ND	ND	ND	ND	ND	ND	ND	ND
	set5	~	ND	ND	ND	ND	ND	ND	ND	ND	ND	ND	ND	ND	ND	ND	ND	ND	ND	ND	ND	ND	ND	ND	ND	ND
	set63	~	ND	ND	ND	ND	1/1	1/1	1/1	1/1	ND	ND	ND	ND	ND	ND	ND	ND	ND	ND	ND	ND	ND	ND	ND	ND
	set73	~	2/2	4/4	2/2	1/1	1/1	1/1	1/1	1/1	1/1	3/3	1/1	1/1	1/1	1/1	1/1	1/1	ND	ND	ND	ND	ND	ND	ND	ND
	set83	~	ND	ND	ND	ND	2/2	2/2	2/2	1/1	ND	ND	ND	ND	ND	ND	ND	ND	ND	ND	ND	ND	ND	ND	ND	ND
	set9	~	ND	ND	ND	ND	ND	ND	ND	ND	ND	ND	ND	ND	ND	ND	ND	ND	ND	ND	ND	ND	ND	ND	ND	ND
	set10	~	ND	ND	ND	ND	1/1	1/1	1/1	1/1	ND	ND	ND	ND	ND	ND	ND	ND	ND	ND	ND	ND	ND	ND	ND	ND
	set11	~	ND	ND	ND	ND	ND	ND	ND	ND	ND	ND	ND	ND	ND	ND	ND	ND	ND	ND	ND	ND	ND	ND	ND	ND
	set123	~	ND	ND	ND	ND	1/1	ND	ND	1/1	ND	ND	ND	ND	ND	ND	ND	ND	ND	ND	ND	ND	ND	ND	ND	ND
	set13	~	ND	ND	ND	ND	1/1	1/1	1/1	1/1	ND	ND	ND	ND	ND	ND	ND	ND	ND	ND	ND	ND	ND	ND	ND	ND
	set14	~	ND	ND	ND	ND	ND	ND	ND	ND	ND	ND	ND	ND	ND	ND	ND	ND	ND	ND	ND	ND	ND	ND	ND	ND
	set153	~	ND	ND	ND	ND	1/1	1/1	1/1	1/1	ND	ND	ND	ND	ND	ND	ND	ND	ND	ND	ND	ND	ND	ND	ND	ND
Streptococcal pyrogenic exotoxin G Q9X5C7	speG	Y	ND	ND	ND	ND	1/1	1/1	1/1	1/1	ND	ND	ND	ND	ND	ND	ND	ND	ND	ND	ND	ND	ND	ND	ND	ND
Host immune evasion
Capsular biosynthesis proteins3 P95695 (cap5), P72367 (cap8)	cap5H	~	1/0	1/0	1/0	1/0	1/0	ND	ND	ND	ND	1/0	ND	ND	ND	ND	ND	ND	ND	ND	ND	ND	ND	ND	ND	ND
	cap5I	~	1/0	1/0	1/0	1/0	1/0	ND	ND	ND	ND	1/0	ND	ND	ND	ND	ND	ND	ND	ND	ND	ND	ND	ND	ND	ND
	cap5J	N	1/0	ND	1/0	1/0	1/0	ND	ND	ND	ND	1/0	ND	ND	ND	ND	ND	ND	ND	ND	ND	ND	ND	ND	ND	ND
	cap5K	N	1/0	1/0	1/0	1/0	1/0	ND	ND	ND	ND	1/0	ND	ND	ND	ND	ND	ND	ND	ND	ND	ND	ND	ND	ND	ND
	cap8H	~	ND	ND	ND	ND	ND	1/0	1/0	1/0	ND	ND	ND	ND	ND	ND	ND	ND	ND	ND	ND	ND	ND	ND	ND	ND
	cap8I	N	ND	ND	ND	ND	ND	1/0	1/0	1/0	ND	ND	ND	ND	ND	ND	ND	ND	1/0	1/0	1/0	ND	1/0	1/0	1/0	1/0
	cap8J	~	ND	ND	ND	ND	ND	1/0	1/0	1/0	ND	ND	ND	ND	ND	ND	ND	ND	ND	ND	ND	ND	ND	ND	ND	ND
	cap8K	N	ND	ND	ND	ND	ND	0 ID97%, QC100%, E: 0.0	0 ID97%, QC100%, E: 0.0	0 ID97%, QC100%, E: 0.0	ND	ND	ND	ND	ND	ND	ND	ND	ND	ND	ND	1/0	ND	ND	ND	ND
Other genes related to the immune evasion
Chemotaxis inhibiting protein CHIPS A6QIG7	chp	Y	ND	ND	ND	ND	ND	ND	ND	ND	ND	ND	ND	ND	ND	ND	ND	ND	ND	ND	ND	ND	ND	ND	ND	ND
Fibrinogen-binding protein A6QG59	fib (efb)	Y	ND	1/1	ND	ND	2/2	2/2	2/2	2/2	ND	ND	ND	ND	ND	ND	ND	ND	ND	ND	ND	ND	ND	ND	ND	ND
Immunoglobulin-binding protein sbi3 Q931F4	sbi	Y	ND	1/1	ND	ND	1/1	1/1	1/1	1/1	ND	1/1	ND	ND	ND	ND	ND	ND	ND	ND	ND	ND	ND	ND	ND	ND
Staphylococcal complement inhibitor (SCIN) Q2FWV6	scn	Y	ND	ND	ND	ND	ND	ND	ND	ND	ND	ND	ND	ND	ND	ND	ND	ND	ND	ND	ND	ND	ND	ND	ND	ND
Phosphatidylglycerol lysyltransferase3 (Multiple peptide resistance factor) Q2G2M2	mprF (fmtC)	N	1/0	1/0	1/0	1/0	1/0	0 ID99%, QC100% E: 0.0	0 ID99%, QC100% E: 0.0	1/0	1/0	1/0	1/0	1/0	1/0	1/0	1/0	1/0	ND	ND	1/0	1/0	1/0	1/0	1/0	1/0
Exoenzymes
Iron uptake
Iron-regulated surface determinant proteins3 A6QG31, A6QG30, Q8KQR1, Q2FXJ2	isdA (sasE)3	Y	ND	ND	ND	ND	1/1	1/1	1/1	1/1	ND	ND	ND	1/1	ND	1/1	ND	1/1	ND	2/2	ND	ND	2/2	ND	ND	ND
	isdB (sasJ)	Y	ND	ND	ND	ND	1/1	1/1	1/1	1/1	ND	ND	ND	ND	ND	ND	ND	ND	ND	ND	ND	ND	ND	ND	ND	ND
	isdC3	Y	ND	ND	ND	ND	1/1	1/1	1/1	1/1	ND	ND	ND	ND	ND	ND	ND	ND	2/2	1/1	2/2	ND	1/1	2/0	2/2	2/2
	isdH (sasI)	Y	ND	ND	ND	ND	1/1	3/1	2/1	1/0	ND	ND	ND	ND	ND	ND	ND	ND	ND	ND	ND	ND	ND	ND	ND	ND
Heme transporter IsdDEF, membrane component IsdD	isdD	~	ND	ND	ND	ND	1/0	1/0	1/0	1/0	ND	ND	ND	ND	ND	ND	ND	ND	ND	ND	ND	ND	ND	ND	ND	ND
High-affinity heme uptake system protein IsdE Q7A652	isdE	N	ND	ND	ND	ND	1/0	1/0	1/0	1/0	ND	ND	ND	ND	ND	ND	ND	ND	1/1	1/1	1/1	ND	1/1	1/0	1/1	1/1
Probable heme-iron transport system permease protein Q6GHV2	isdF	N	ND	ND	ND	ND	1/1	1/1	1/1	1/1	ND	ND	ND	ND	ND	ND	ND	ND	1/0	ND	1/0	ND	1/0	1/0	1/0	1/0
Heme oxygenases2 (staphylobilin-producing) A6QG37, Q7A827	isdG	N	ND	ND	ND	ND	1/0	1/0	1/0	1/0	ND	ND	ND	ND	ND	ND	ND	ND	1/0	1/0	1/0	1/0	1/0	1/0	1/0	1/0
	isdI	N	1/0	1/0	1/0	1/0	1/0	1/0	1/0	1/0	1/0	1/0	1/0	1/0	1/0	1/0	1/0	1/0	1/0	1/0	1/0	ND	1/0	1/0	1/0	1/0
Sortases A and B	srtA	~	1/0	1/0	1/0	1/0	1/0	1/0	1/0	1/0	1/0	1/0	1/0	1/0	1/0	1/0	1/0	1/0	1/0	1/0	1/0	1/0	1/0	1/0	1/0	1/0
	srtB	~	ND	ND	ND	ND	1/0	1/0	1/0	1/0	ND	ND	ND	ND	ND	ND	ND	ND	1/0	1/0	1/0	ND	1/0	1/0	1/0	1/0
Other exoenzymes
Catalase Q2FYU7	katA	N	2/0	2/0	2/0	2/0	1/0	1/0	1/0	1/0	2/0	2/0	2/0	2/0	2/0	2/0	2/0	2/0	2/0	2/0	2/0	2/0	2/0	2/0	2/0	2/0
Staphylocoagulase P07767	coa	Y	2/1	2/1	2/2	1/1	1/1	1/1	1/1	1/1	ND	ND	ND	ND	ND	ND	ND	ND	ND	ND	ND	ND	ND	ND	ND	ND
Glyseraldehyde 3-phosphate dehydrogenase (GAPDH)	gapA1, gapA2	~	2/0	2/0	2/0	2/0	2/0	2/0	2/0	2/0	2/0	2/0	2/0	2/0	2/0	2/0	2/0	2/0	2/0	2/0	2/0	2/0	2/0	2/0	2/0	2/0
Hyaluronate lyase (Hyaluronidase) Q59801	hysA	Y	1/1	1/1	1/1	1/1	1/0	2/0	2/0	2/0	ND	ND	ND	ND	ND	ND	ND	ND	ND	ND	ND	ND	ND	ND	ND	ND
von Willebrand factor binding protein	vwb	~	2/2	1/1	1/1	1/1	2/2	2/2	2/2	2/2	1/1	1/1	1/1	1/1	1/1	1/1	1/1	1/1	ND	ND	ND	ND	ND	ND	ND	ND
Staphylokinase P68802	sak	Y	ND	ND	ND	ND	ND	ND	ND	ND	ND	ND	ND	ND	ND	ND	ND	ND	ND	ND	ND	ND	ND	ND	ND	ND
Thermonuclease P00644	nuc	Y	1/0	1/0	1/0	1/0	1/0	1/0	1/0	1/0	1/1	1/1	1/1	1/0	1/1	1/0	1/0	1/0	1/0	1/0	1/0	1/1	1/0	1/0	1/0	1/0
Zinc metalloproteinase aureolysin P81177	aur	Y	1/1	1/1	1/1	1/1	1/1	1/1	1/1	1/1	1/1	1/1	1/1	1/1	1/1	1/1	1/1	1/1	ND	ND	ND	ND	ND	ND	ND	ND
Glutamyl endopeptidase (V8 protease) Q2FZL2	sspA	Y	ND	ND	ND	ND	1/1	1/1	1/1	1/1	ND	ND	ND	ND	ND	ND	ND	ND	ND	ND	ND	ND	ND	ND	ND	ND
Staphopain A and B (Cysteine proteinase A and B) P81297, AF309515	sspP (scpA)	Y	1/1	1/1	1/1	1/1	1/1	1/1	1/1	1/1	ND	ND	ND	ND	ND	ND	ND	ND	ND	1/1	1/1	1/1	1/1	1/0	1/1	1/1
	sspB	Y	ND	ND	ND	ND	1/1	1/1	1/1	1/1	ND	ND	ND	ND	ND	ND	ND	ND	ND	ND	ND	ND	ND	ND	ND	ND
Staphostatin B (Cysteine protease inhibitor B) Q9EYW6	sspC1	N	ND	ND	ND	ND	1/0	1/0	1/0	1/0	ND	ND	ND	ND	ND	ND	ND	ND	ND	ND	ND	ND	ND	ND	ND	ND
MSCRAMM
Extracellular matrix-binding protein Q8NWQ6	ebh	N	ND	ND	ND	ND	ID 98%, QC 100% E: 0.0	ID 96%, QC 100% E: 0.0	ID 96%, QC 100% E: 0.0	ID 96%, QC 100% E: 0.0	ND	ND	ND	ND	ND	ND	ND	ND	ND	ND	ND	ND	ND	ND	ND	ND
Collagen adhesin Q53654	cna	Y	1/1	1/0	1/1	1/1	ND	ND	ND	ND	ND	ND	ND	ND	ND	ND	ND	ND	ND	ND	ND	ND	ND	ND	ND	ND
Elastin binding protein EbpS Q53630	ebpS	N	3/0	1/0	1/0	1/0	1/0	1/0	1/0	1/0	1/0	1/0	1/0	1/0	1/0	1/0	1/0	1/0	1/0	1/0	1/0	1/0	1/0	1/0	1/0	1/0
Enolase Q2G028	eno	Y/N	1/0	1/0	1/0	1/0	1/0	1/0	1/0	1/0	1/0	1/0	1/0	1/0	1/0	1/0	1/0	1/0	1/0	1/0	1/0	1/0	1/0	1/0	1/0	1/0
Extracellular adherence protein of broad specificity Eap/Map	mapW	~	ND	ND	ND	ND	2/0	2/1	2/1	2/1	ND	ND	ND	ND	ND	ND	ND	ND	ND	ND	ND	ND	ND	ND	ND	ND
Fibronectin binding proteins FnbA and FnbB2 Q5HD51 (fnbA)	fnbA, fnbB	Y	6/3	5/3	5/1	5/1	2/0	1/0	1/0	1/1	2/1	2/2	2/1	2/1	2/1	2/1	2/1	2/1	ND	ND	ND	ND	ND	ND	ND	ND
Fibronectin/fibrinogen-binding protein	fbe	~	1/0	1/0	1/0	1/0	1/0	1/0	1/0	1/0	1/0	1/0	1/0	1/0	1/0	1/0	1/0	1/0	1/0	1/0	1/0	1/0	1/0	1/0	1/0	1/0
Polysaccharide intercellular adhesin proteins (Biofilm operon icaADBC and HTH-type negative transcriptional regulator IcaR) A6QKF4, Q9RQP9, Q9RQP7, Q9RQP6, Q9RQP8	icaR	~	ND	ND	ND	ND	1/0	1/0	1/0	1/0	ND	ND	ND	ND	ND	ND	ND	ND	ND	1/0	1/0	1/0	1/0	1/0	1/0	1/0
	icaA	N	ND	ND	ND	ND	1/0	1/0	1/0	1/0	ND	ND	ND	ND	ND	ND	ND	ND	ND	ND	ND	ND	ND	ND	ND	ND
	icaB	Y	ND	ND	ND	ND	1/1	1/0	1/1	1/0	ND	ND	ND	ND	ND	ND	ND	ND	ND	ND	ND	ND	ND	ND	ND	ND
	icaC	N	ND	ND	ND	ND	1/0	1/0	1/0	1/0	ND	ND	ND	ND	ND	ND	ND	ND	1/0	1/0	1/0	1/0	1/0	1/0	1/0	1/0
	icaD	N	ND	ND	ND	ND	0 ID99%, QC100% E: 2e-158	1/0	0 ID99%, QC100% E: 2e-158	1/0	ND	ND	ND	ND	ND	ND	ND	ND	ND	ND	ND	ND	ND	ND	ND	ND
Immunoglobulin G-binding protein A3 (Staphylococcal protein A) P02976	spa	Y	2/1	1/0	2/1	2/1	1/1	2/1	2/1	2/1	1/1	2/2	1/1	1/1	1/1	1/1	1/1	1/1	ND	ND	ND	ND	ND	ND	ND	ND
Serine-rich adhesin for platelets2 (Staphylococcus aureus surface protein A) Q2FUW1	sraP (sasA)	Y	ND	ND	ND	ND	1/0	1/0	1/0	1/0	ND	ND	ND	ND	ND	ND	ND	ND	1/1	1/0	ND	ND	ND	1/0	ND	ND
Surface protein sasB	sasB	~	ND	ND	ND	ND	ND	ND	ND	ND	ND	ND	ND	ND	ND	ND	ND	ND	ND	ND	ND	ND	ND	ND	ND	ND
Cell-wall-anchored protein SasC	sasC	~	ND	ND	ND	ND	1/1	3/1	3/1	3/1	ND	ND	ND	ND	ND	ND	ND	ND	ND	ND	ND	ND	ND	ND	ND	ND
Cell-wall-anchored protein SasD	sasD	~	ND	ND	ND	ND	1/1	1/1	1/1	1/1	ND	ND	ND	ND	ND	ND	ND	ND	ND	ND	ND	ND	ND	ND	ND	ND
Predicted cell-wall-anchored protein sasF2	sasF	~	1/1	1/1	1/1	1/1	1/1	1/1	1/1	1/1	1/0	1/1	1/0	1/1	1/1	1/0	1/0	1/0	1/1	1/1	1/1	1/1	1/1	1/0	1/1	1/1
Surface protein G Q2G2B2	sasG	Y	ND	ND	ND	ND	1/1	ND	ND	ND	ND	ND	ND	ND	ND	ND	ND	ND	ND	ND	ND	ND	ND	ND	ND	ND
Surface protein SasH	sasH	Y	1/1	1/1	1/1	1/1	1/1	1/1	1/1	1/1	1/1	1/1	1/1	1/1	1/1	1/1	1/1	1/1	1/1	1/1	1/1	1/1	1/1	1/0	1/1	1/1
Cell-wall-anchored protein SasK	sasK	~	ND	ND	ND	ND	1/1	ND	ND	ND	ND	ND	ND	ND	ND	ND	ND	ND	ND	ND	ND	ND	ND	ND	ND	ND
Biofilm-associated protein3	bap	~	1/1	1/1	1/1	1/1	ND	ND	ND	ND	ND	ND	ND	ND	1/0	ND	ND	ND	ND	ND	ND	ND	ND	ND	ND	ND
Sdr-family
Bone sialoprotein-binding protein Q14U76	bbp	~	ND	ND	ND	ND	0 ID89%, QC100% E: 0.0	0 ID95%, QC100% E: 0.0	0 ID95%, QC100% E: 0.0	0 ID95%, QC100% E: 0.0	ND	ND	ND	ND	ND	ND	ND	ND	ND	ND	ND	ND	ND	ND	ND	ND
Clumping factor A Q53653	clfA	Y	ND	ND	ND	ND	ND	1/1	1/1	1/1	ND	ND	ND	ND	ND	ND	ND	ND	ND	ND	ND	ND	ND	ND	ND	ND
Clumping factor B O86476	clfB	Y	ND	ND	ND	ND	1/1	1/1	1/1	1/1	ND	ND	ND	ND	ND	ND	ND	ND	ND	ND	ND	ND	ND	ND	ND	ND
Serine-aspartate repeat-containing protein C3 Q7A781	sdrC	Y	ND	ND	ND	ND	3/0	3/1	3/1	1/1	1/1	1/1	1/1	1/1	1/1	1/1	ND	1/1	ND	1/1	ND	ND	ND	ND	ND	ND
Serine-aspartate repeat-containing protein D3	sdrD	~	ND	ND	ND	ND	0 ID94%, QC94% E: 0.0	ND	ND	ND	ND	ND	ND	ND	ND	ND	ND	ND	2/0	1/1	ND	ND	1/0	ND	1/0	ND
Serine-aspartate repeat-containing protein E3	sdrE	~	ND	ND	ND	ND	0 ID96%, QC100% E: 0.0	1/1	1/1	1/1	ND	ND	ND	ND	ND	ND	ND	ND	ND	ND	1/0	ND	ND	1/0	ND	1/0
Serine-aspartate repeat-containing protein F-G Q9KI14, Q9KI13	sdrF, sdrG	~	ND	ND	ND	ND	ND	ND	ND	ND	ND	ND	ND	ND	ND	ND	ND	ND	ND	ND	ND	ND	ND	ND	ND	ND
SdrH protein	sdrH	~	ND	ND	ND	ND	ND	ND	ND	ND	ND	ND	ND	ND	ND	ND	ND	ND	ND	ND	ND	ND	ND	ND	ND	ND
Serine-aspartate repeat-containing protein I2 Q8KWM1	sdrI	Y	1/0	1/0	1/0	ND	ND	ND	ND	ND	ND	ND	1/0	ND	ND	ND	ND	ND	ND	ND	ND	ND	ND	ND	ND	ND
Regulatory proteins
Accessory gene regulator proteins2 Q5HEG2 (agrA), Q5HEG5 (agrB)	agrA2	N	1/0	1/0	1/0	1/0	1/0	1/0	1/0	1/0	1/0	1/0	1/0	1/0	1/0	1/0	1/0	1/0	1/0	1/0	1/0	1/0	1/0	1/0	1/0	1/0
	agrB	N	1/0	1/0	1/0	1/0	1/0	1/0	1/0	1/0	1/0	1/0	1/0	1/0	1/0	1/0	1/0	1/0	1/0	1/0	1/0	1/0	1/0	1/0	1/0	1/0
	agrC2	~	1/0	1/0	1/0	1/0	1/0	1/0	1/0	1/0	1/0	1/0	1/0	1/0	1/0	1/0	1/0	1/0	1/0	1/0	1/0	1/0	1/0	1/0	1/0	1/0
	agrD2	~	ND	ND	ND	ND	1/0	1/0	1/0	1/0	ND	ND	ND	ND	ND	ND	ND	ND	ND	ND	ND	ND	ND	ND	ND	ND
Histidine protein kinase SaeS and Response regulator SaeR of two component regulatory system SaeR/SaeS2 Q8KWM1, Q2G2G2	saeS2	N	ND	ND	ND	ND	1/0	1/0	1/0	1/0	ND	ND	ND	ND	ND	ND	ND	ND	1/0	1/0	1/0	1/0	1/0	1/0	1/0	1/0
	saeR	N	ND	ND	ND	ND	1/0	1/0	1/0	1/0	ND	ND	ND	ND	ND	ND	ND	ND	1/0	1/0	1/0	1/0	1/0	1/0	1/0	1/0
MarR/SlyA-family, Sar-subfamily of transcriptional regulators
HTH-type transcriptional regulator rot (Repressor of toxins) Q9RFJ6	rot	N	1/0	1/0	1/0	1/0	1/0	1/0	1/0	1/0	1/0	1/0	1/0	1/0	1/0	1/0	1/0	1/0	ND	ND	ND	ND	ND	ND	ND	ND
Transcriptional regulator SarA2 (Staphylococcal accessory regulator A) Q9F0R1	sarA	N	1/0	1/0	1/0	1/0	1/0	1/0	1/0	1/0	1/0	1/0	1/0	1/0	1/0	1/0	1/0	1/0	1/0	1/0	1/0	1/0	1/0	1/0	1/0	1/0
HTH-type transcriptional regulators2 Q7A2Y8 (sarS), Q7A3K1 (sarT), Q7A004 (sarU), Q99S05 (sarV), Q5HI00 (sarX), Q2G0B1 (mgrA), Q2FVN3 (sarZ)	sarS2	N	ND	ND	ND	ND	1/0	1/0	1/0	1/0	ND	ND	ND	ND	ND	ND	ND	ND	ND	ND	ND	ND	ND	ND	ND	ND
	sarR2	~	1/0	1/0	1/0	1/0	1/0	1/0	1/0	1/0	1/0	1/0	1/0	1/0	1/0	1/0	1/0	1/0	1/0	1/0	1/0	1/0	1/0	1/0	1/0	1/0
	sarT	N	ND	ND	ND	ND	1/0	ND	ND	ND	ND	ND	ND	ND	ND	ND	ND	ND	ND	ND	ND	ND	ND	ND	ND	ND
	sarU	N	ND	ND	ND	ND	1/0	ND	ND	ND	ND	ND	ND	ND	ND	ND	ND	ND	ND	ND	ND	ND	ND	ND	ND	ND
	sarV	N	ND	ND	ND	ND	1/0	1/0	1/0	1/0	ND	ND	ND	ND	ND	ND	ND	ND	1/0	1/0	1/0	1/0	1/0	1/0	1/0	1/0
	sarY	~	ND	ND	ND	ND	ND	ND	ND	ND	ND	ND	ND	ND	ND	ND	ND	ND	ND	ND	ND	ND	ND	ND	ND	ND
	sarX	N	ND	ND	ND	ND	ID100%, QC100% E: 0.0	ID100%, QC99% E: 0.0	ID100%, QC99% E: 0.0	ID100%, QC99% E: 0.0	ND	ND	ND	ND	ND	ND	ND	ND	ND	ND	ND	ND	ND	ND	ND	ND
	mgrA2	N	1/0	1/0	1/0	1/0	1/0	1/0	1/0	1/0	1/0	1/0	1/0	1/0	1/0	1/0	1/0	1/0	1/0	1/0	1/0	1/0	1/0	1/0	1/0	1/0
	sarZ2	N	1/0	1/0	1/0	1/0	1/0	1/0	1/0	1/0	1/0	1/0	1/0	1/0	1/0	1/0	1/0	1/0	1/0	1/0	1/0	1/0	1/0	1/0	1/0	1/0
Miscellanous proteins
Probable transglycosylase IsaA3 (Immunodominant staphylococcal antigen A) Q2FV52	isaA	Y	ND	ND	ND	ND	1/1	1/1	1/1	1/1	1/1	1/1	1/1	1/1	1/1	1/1	1/1	1/1	1/1	1/1	1/1	1/1	1/1	1/1	1/1	1/1
Immunodominant staphylococcal antigen B Q2YZ63	isaB	Y	3/3	3/3	3/3	3/3	1/1	1/1	1/1	1/1	3/2	2/2	3/3	3/3	3/3	3/2	3/2	3/3	ND	ND	ND	ND	ND	ND	ND	ND
Surface protein3 (Plasmin-sensitive surface protein) P80544	pls	Y	ND	ND	ND	ND	1/0	ND	ND	ND	3/1	ND	1/1	1/1	ND	3/1	2/1	ND	2/1	2/0	ND	1/0	3/1	ND	ND	ND
Epidermal cell differentation inhibitor P24121	N/A	Y	ND	ND	ND	ND	ND	ND	ND	ND	ND	ND	ND	ND	ND	ND	ND	ND	ND	ND	ND	ND	ND	ND	ND	ND
Urease subunits Q2YYQ8, Q2YYQ7, Q2YYQ6	ureA	N	1/0	1/0	1/0	1/0	1/0	1/0	1/0	1/0	1/0	1/0	1/0	1/0	1/0	1/0	1/0	1/0	1/0	1/0	1/0	1/0	1/0	1/0	1/0	1/0
	ureB	N	1/0	1/0	1/0	1/0	1/0	1/0	1/0	1/0	1/0	1/0	1/0	1/0	1/0	1/0	1/0	1/0	1/0	1/0	1/0	1/0	1/0	1/0	1/0	1/0
	ureC	N	1/0	1/0	1/0	1/0	1/0	1/0	1/0	1/0	1/0	1/0	1/0	1/0	1/0	1/0	1/0	1/0	1/0	1/0	1/0	1/0	1/0	1/0	1/0	1/0
Urease accessory proteins Q2YYV1, Q2YYQ5, Q2YYS9, Q2YYV2	ureD	N	1/0	1/0	1/0	1/0	1/0	1/0	1/0	1/0	1/0	1/0	1/0	1/0	1/0	1/0	1/0	1/0	1/0	1/0	1/0	1/0	1/0	1/0	1/0	1/0
	ureE	N	1/0	1/0	1/0	1/0	1/0	1/0	1/0	1/0	1/0	1/0	1/0	1/0	1/0	1/0	1/0	1/0	1/0	1/0	1/0	1/0	1/0	1/0	1/0	1/0
	ureF	N	1/0	1/0	1/0	1/0	1/0	1/0	1/0	1/0	1/0	1/0	1/0	1/0	1/0	1/0	1/0	1/0	1/0	1/0	1/0	1/0	1/0	1/0	1/0	1/0
	ureG	N	1/0	1/0	1/0	1/0	1/0	1/0	1/0	1/0	1/0	1/0	1/0	1/0	1/0	1/0	1/0	1/0	1/0	1/0	1/0	1/0	1/0	1/0	1/0	1/0
Gas vesicle proteins:
Gas vesicle protein GvpU3	gvpU	~	1/0	1/0	1/0	1/0	ND	ND	ND	ND	ND	1/0	ND	ND	ND	ND	ND	ND	ND	ND	ND	ND	ND	ND	ND	ND
Gas vesicle structural protein GvpJ2	gvpJ	~	1/0	1/0	1/0	1/0	ND	ND	ND	ND	ND	1/0	ND	ND	ND	ND	ND	ND	1/0	1/0	1/0	ND	1/0	1/0	1/0	1/0
Gas vesicle structural protein GvpA2	gvpA	~	1/0	1/0	1/0	1/0	ND	ND	ND	ND	ND	1/0	ND	ND	ND	ND	ND	ND	1/0	1/0	1/0	ND	1/0	1/0	1/0	1/0
Gas vesicle structural protein GvpS	gvpS	~	1/0	1/0	1/0	1/0	ND	ND	ND	ND	ND	1/0	ND	ND	ND	ND	ND	ND	1/0	1/0	1/0	ND	1/0	1/0	1/0	1/0
Gas vesicle protein GvpK	gvpK	~	1/0	1/0	1/0	1/0	ND	ND	ND	ND	ND	1/0	ND	ND	ND	ND	ND	ND	1/0	1/0	1/0	ND	1/0	1/0	1/0	1/0
Protein GvpL/F2 (Gas vesicle protein, GvpL/GvpF family)	gvpF, gvpL	~	2/0	2/0	2/0	2/0	ND	ND	ND	ND	ND	2/0	ND	ND	ND	ND	ND	ND	2/0	2/0	2/0	ND	2/0	2/0	2/0	2/0
cIsolate from clinical mastitis
sIsolate from subclinical mastitis
1Recommended name is given in bold, possible synonyms are given in the parentheses. If available, UniProt accession number for one reviewed reference protein sequence is given below the name.
2Discrepancies observed in combined automatic annotation and pan-genome data; corrected using BLAST analysis.
3Discrepancies observed in combined automatic annotation and pan-genome data.
4 The information regarding extracellular/cell wall location of reviewed reference Staphylococcus virulence factor protein sequences is derived from UniprotKB database; for streptococcal pyrogenic exotoxin G the secretion information of reference Streptococcus sequence is given.
	Y, Reference Staphylococcus protein sequence extracellular or located in cell wall
	N, Reference Staphylococcus protein sequence not extracellular/located in cell wall
	~, No reviewed reference sequence available in UniProt database and/or the cellular location of reference Staphylococcus reference protein not resolved.
