# Supplementary material for: Comparative genome analysis of 24 bovine-associated Staphylococcus isolates with special focus on the putative virulence genes
Source: PeerJ. 2018 Mar 30;6:e4560. doi: 10.7717/peerj.4560 (PMC5880176; doi:10.7717/peerj.4560)
Supplement: Table S4 — 1 Non-hemolytic: no hemolysis detected; complete: clear zone around the colonies; incomplete: broad zone of incompletely lysed erythrocytes around the colonies, double: a clear inner zone together with a broad incomplete outer zone. [file peerj-06-4560-s004.xlsx]

## Sheet: Sheet1
	% of hemolytic isolates
Type of hemolysis1	S. aureus	S. agnetis	S. simulans	S. chromogenes
After 23 h of incubation
Non-hemolytic	0	100	25	87.5
Complete2	0	0	75	12.5
Incomplete	0	0	0	0
Double	100	0	0	0
After 42 h of incubation
Non-hemolytic	0	100	0	12.5
Complete	0	0	100	87.5
Incomplete	0	0	0	0
Double	100	0	0	0
